# Supplementary material for: The Impact of La Doping on Dry Reforming Ni-Based Catalysts Loaded on FSP-Alumina
Source: Springer Nature journal article supplement (doi:10.1007/s11244-018-1015-1), 2018-07-02
Supplement: MOESM1 [file 15902252]

**Supporting Information:**


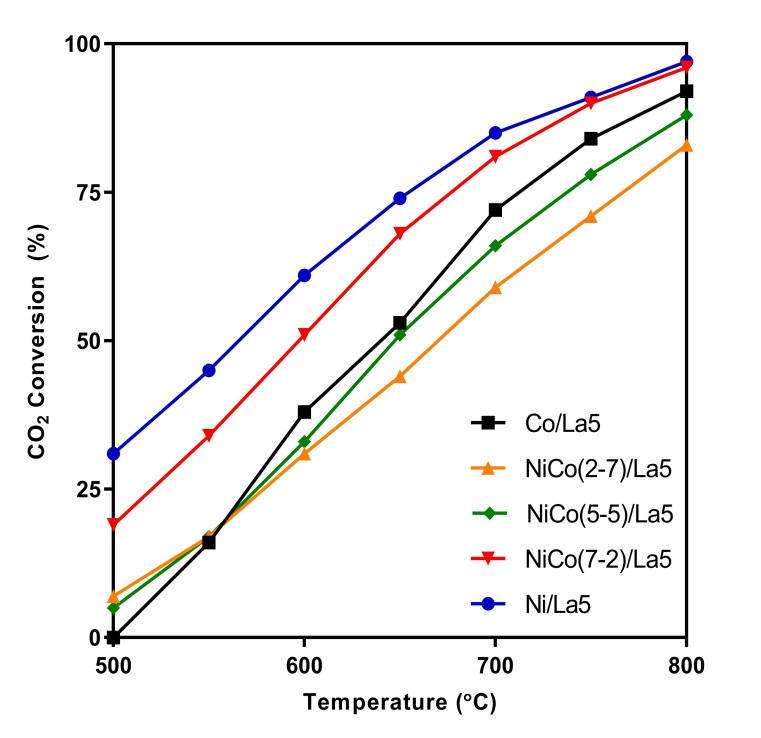

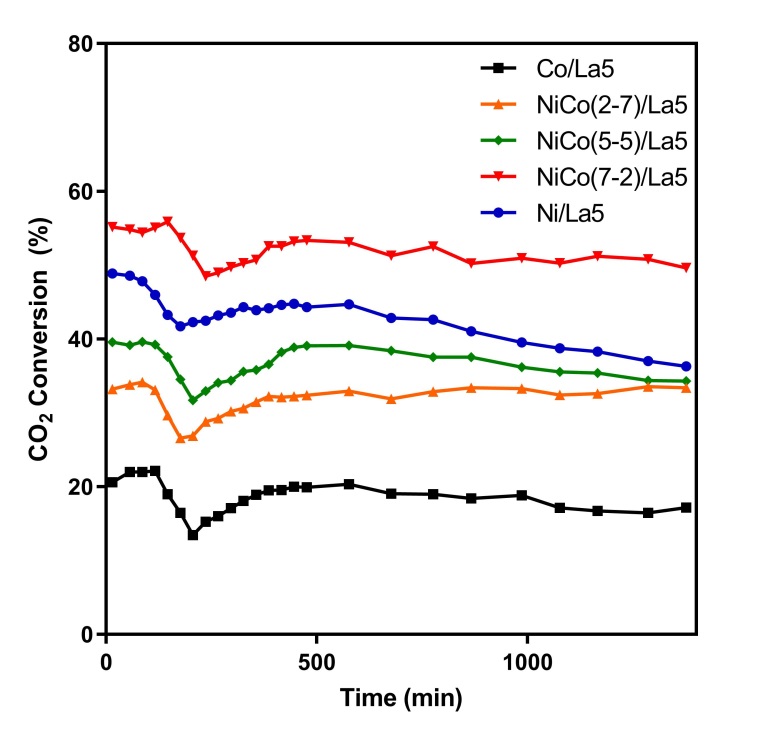


**b)**

**a)**

Figure S-1: Carbon dioxide conversion as a function of a) temperature or b) time (at 600oC), exhibited by monometallic Ni, monometallic Co and bimetallic NiCo on FSP-alumina supports with 5 wt% La doping. Reaction conditions: N2:CH4:CO2 = 1:1:1, catalyst loading = 0.025 g, WHSV = 144 L/(h.gcat)


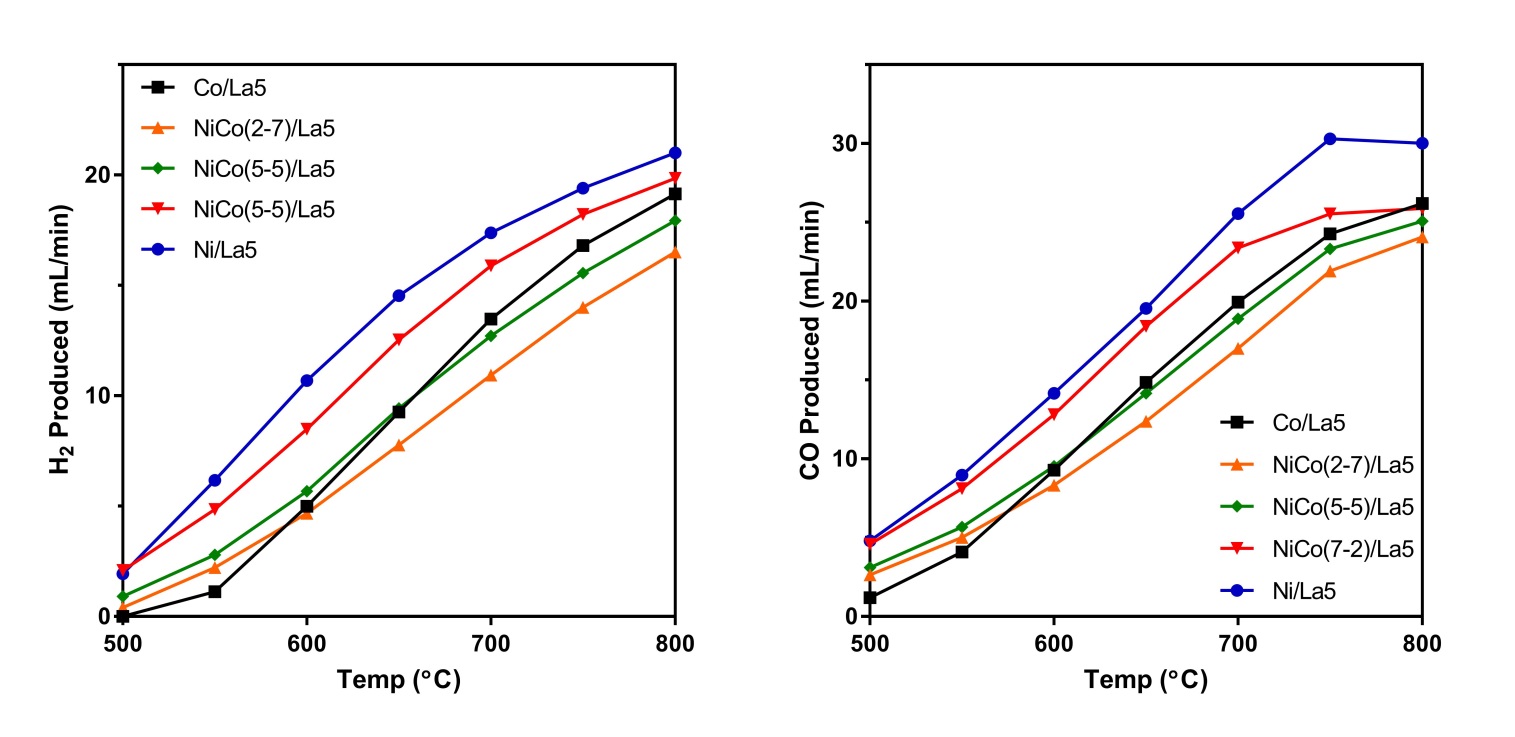


**a)**

**b)**

Figure S-2: a) Hydrogen and b) carbon monoxide produced during dry reforming, as a function of temperature, exhibited by monometallic Ni, monometallic Co and bimetallic NiCo on FSP-alumina supports with 5 wt% La doping. Reaction conditions: N2:CH4:CO2 = 1:1:1, catalyst loading = 0.025 g, WHSV = 144 L/(h.gcat)

**Figure S-3:** **(a) Bright field, (b) HAADF, and (c) HAADF with EDS mapping images of Co/La5; (d) bright field, (e) HAADF, and (f) HAADF with EDS mapping images of NiCo(7-2)/La5; (h) Bright field, (h) HAADF, and (i) HAADF with EDS mapping images of Ni/La5;. Images collected using HR-TEM. Within the EDS maps, the atoms of Al (yellow), Ni (blue) and Co (red) were identified.**


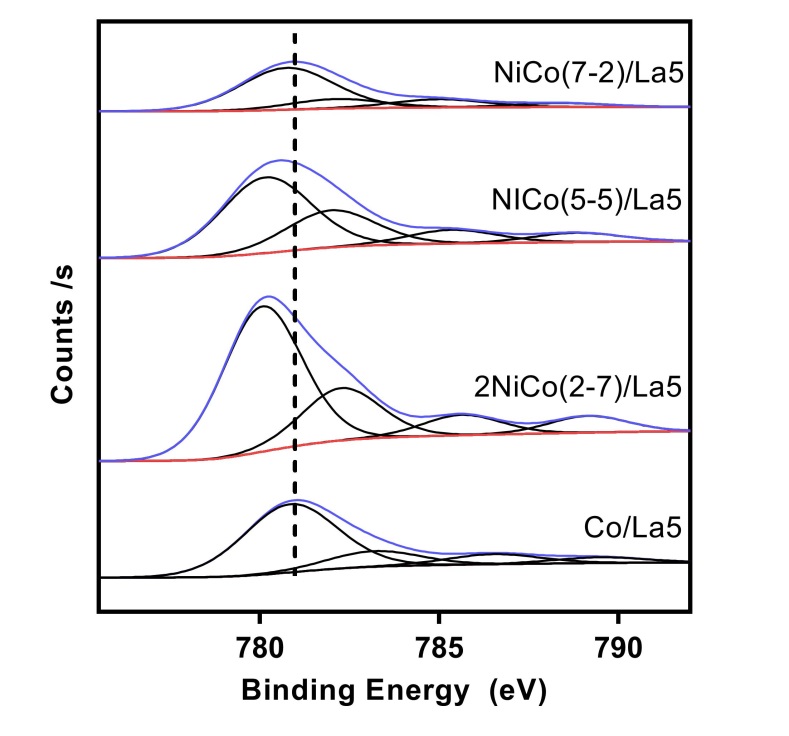

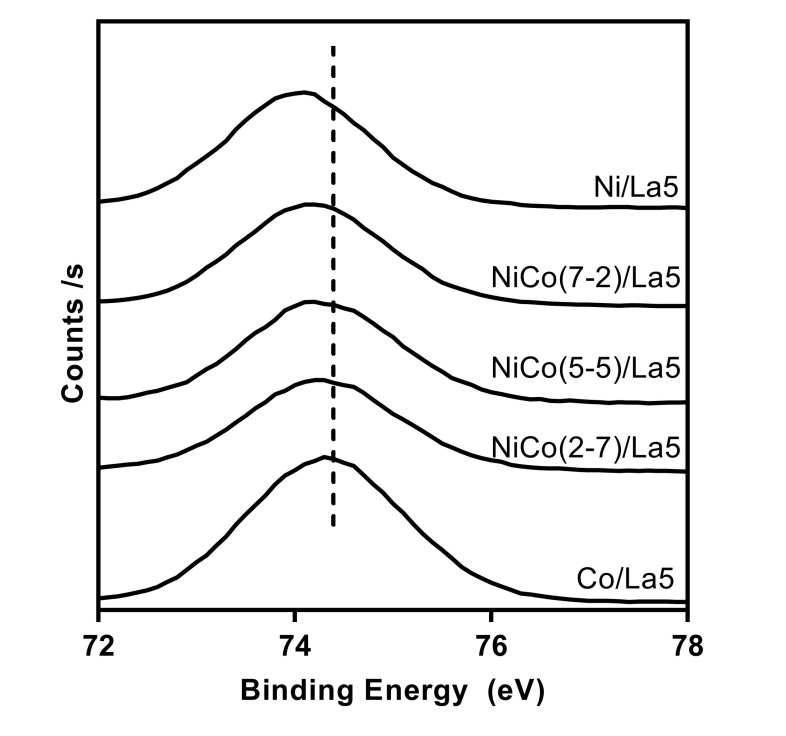


**b)**

**a)**


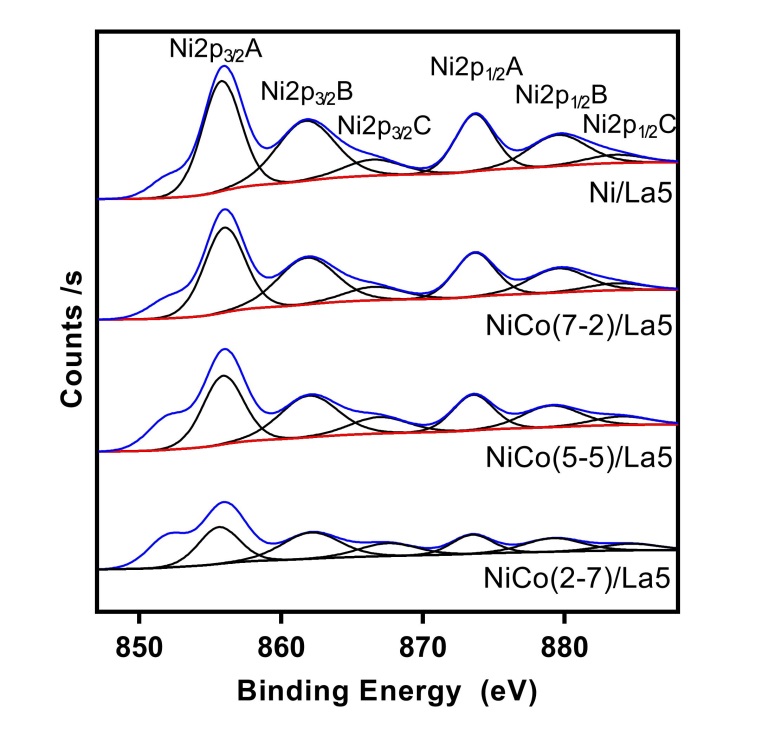

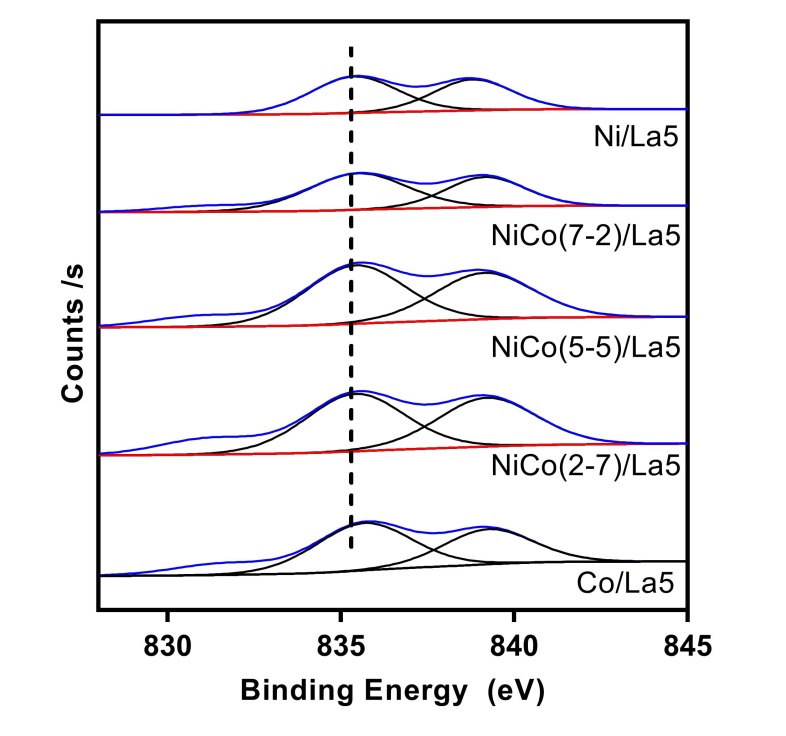


**d)**

**c)**

Figure S-4: a) Co 2p, b) Al 2p, c) Ni 2p and d) La 3d XPS profiles of monometallic Ni (Ni/La5), monometallic Co (Co/La5) and bimetallic NiCo (NiCo(7-2)/La5, NiCo(5-5)/La5, NiCo(2-7)/La5) on FSP-alumina supports with 5 wt% La doping.

Table S-1: Loadings of Ni, Co and La after support preparation via flame spray pyrolysis and subsequent impregnation, as determined via ICP-OES analysis

| **Sample Name** | **Actual Loading (wt%)** | | |
| --- | --- | --- | --- |
| **Ni** | **Co** | **La** |
| Co/La5 | - | 7.5 | 2.3 |
| NiCo(2-7)/La5 | 2.2 | 6.2 | 2.0 |
| NiCo(5-5)/La5 | 4.6 | 4.6 | 2.2 |
| NiCo(7-2)/La5 | 6.5 | 2.1 | 1.9 |
| Ni/La5 | 8.3 | - | 2.0 |
